# Supplementary material for: A new ZnO nanotetrapods/SnO2 nanoparticles composite photoanode for high efficiency flexible dye-sensitized solar cells
Source: Royal Society of Chemistry journal article supplement (doi:10.1039/c000584c), 2010-01-01
Supplement: c000584c.pdf [file c000584c.pdf]

**Supplementary Material (ESI) for PCCP**  
**This journal is © the Owner Societies 2010**

5

**A New ZnO Nanotetrapods/SnO<sub>2</sub> Nanoparticles Composite Photoanode  
for High Efficiency Flexible Dye-sensitized Solar Cells**

10

Wei Chen, Yongcai Qiu, and Shihe Yang\*

Supplementary Material

Supplementary Material (ESI) for PCCP  
This journal is © the Owner Societies 2010

15

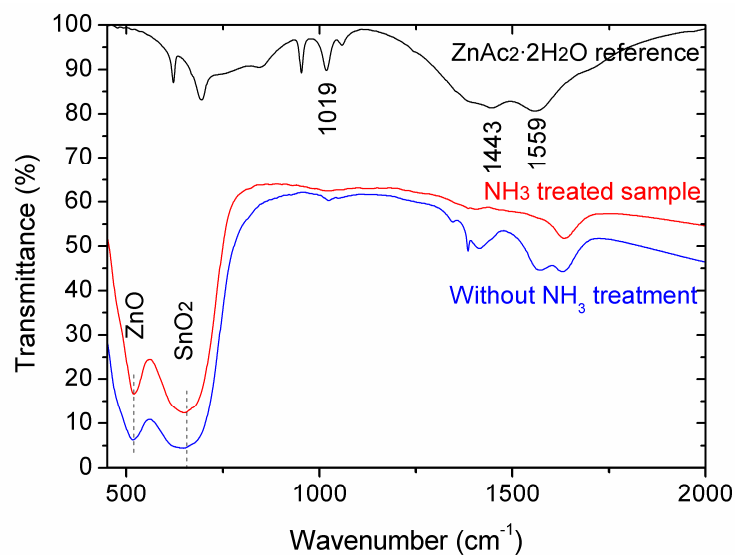

**Figure S1.** Infra-red spectra of composite films with and without NH<sub>3</sub> treatment, with the top being the spectrum of a ZnAc<sub>2</sub>·2H<sub>2</sub>O reference sample. Peaks associated with carboxylate bands of ZnAc<sub>2</sub>,  
20 the antisymmetric stretch at 1559 cm<sup>-1</sup>, the symmetric stretch at 1443 cm<sup>-1</sup>, get smaller evidently due to NH<sub>3</sub> treatment of the composite film, reflecting the elimination of ZnAc<sub>2</sub> shell by the treatment. Peaks at 519 and 651 cm<sup>-1</sup> correspond to stretching bands of crystalline ZnO and SnO<sub>2</sub>, respectively, in the composite films.

25

**Supplementary Material (ESI) for PCCP**  
**This journal is © the Owner Societies 2010**

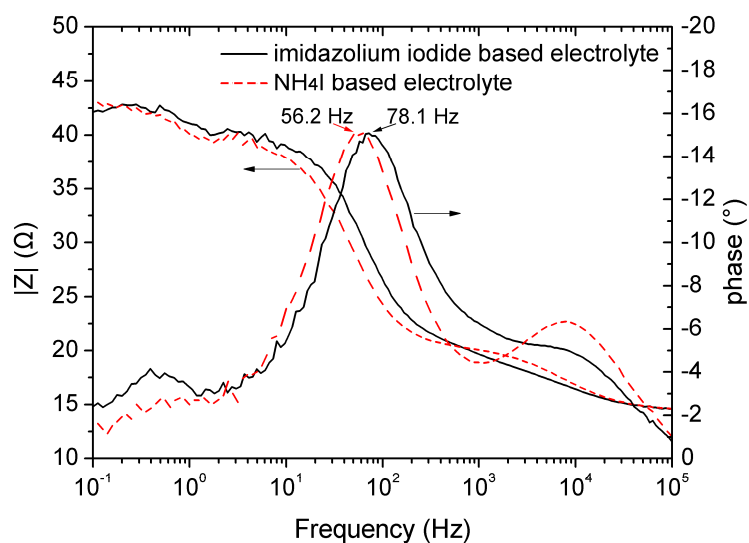

<sup>30</sup> **Figure S2.** Impedance spectra (Bode plots) of composite photoanode based DSSCs using different electrolytes. The characteristic frequencies ( $f_r$ ) for recombination process in NH<sub>4</sub>I based electrolyte (56.2 Hz) is significantly lower than that in imidazolium iodide based electrolyte (78.1 Hz), which implies much longer recombination time ( $\tau_r$ ) in NH<sub>4</sub>I based electrolyte using  $\tau_r = 1/(2\pi f_r)$  for calculation.

35

**Supplementary Material (ESI) for PCCP**  
**This journal is © the Owner Societies 2010**

40

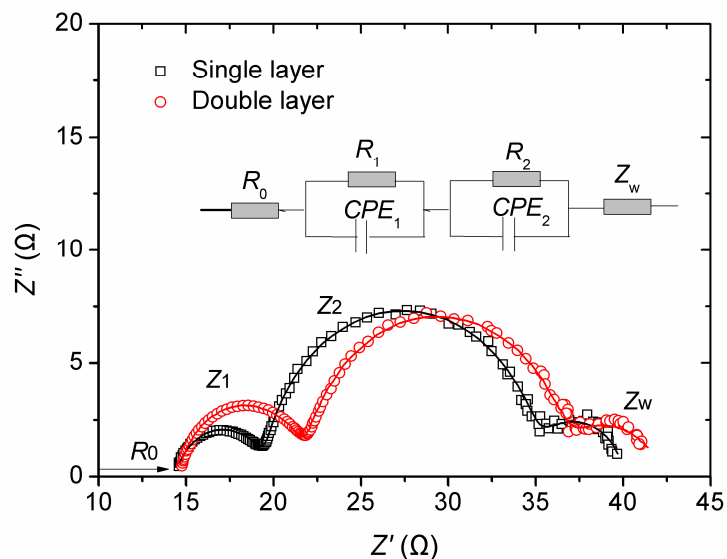

**Figure S3.** Impedance spectra of a single-layer composite film with a thickness of 10.3  $\mu\text{m}$  ( $\square$ ) and a double-layer-structured film ( $\circ$ ) with a 3.3  $\mu\text{m}$  nanotetrapods scattering layer on the top. The inset is a simplified fitting model:  $R_0$  derives from sheet resistance of FTO-coated glass,  $Z_1$  is associated with charge transport at FTO/active film, Pt/electrolyte, and inter-nanostructure interfaces,  $Z_2$  is with respect to charge transport at active film/electrolyte interface,  $Z_w$  is Warburg diffusion impedance of electrolyte ions. The fitting lines reveal that  $R_1$  increases from 5.16 to 7.34  $\Omega$  and  $R_2$  decreases from 15.6 to 14.7  $\Omega$  due to the addition of the light scattering layer.  $R_1$ ,  $R_2$  contribute to the total series resistance and shunt resistance of the solar cell, respectively.

50

**Supplementary Material (ESI) for PCCP**  
**This journal is © the Owner Societies 2010**

55

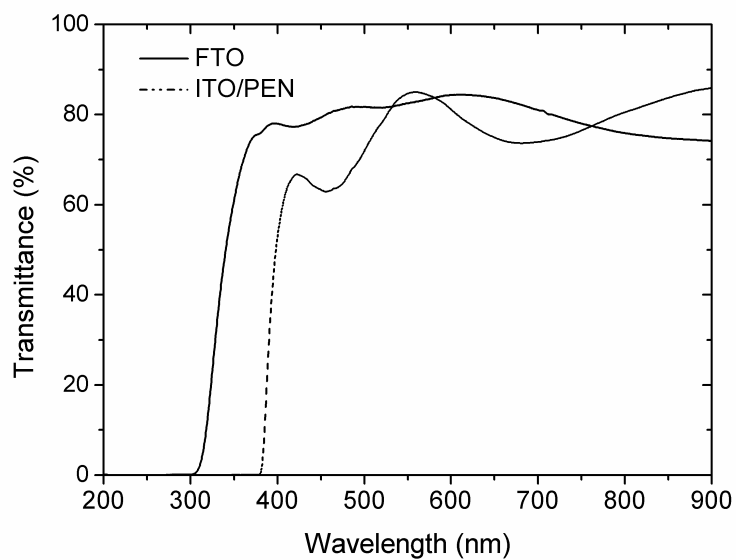

**Figure S4.** UV-Vis transmittance spectra of FTO-coated glass and ITO/PEN films.

60

Supplementary Material (ESI) for PCCP  
This journal is © the Owner Societies 2010

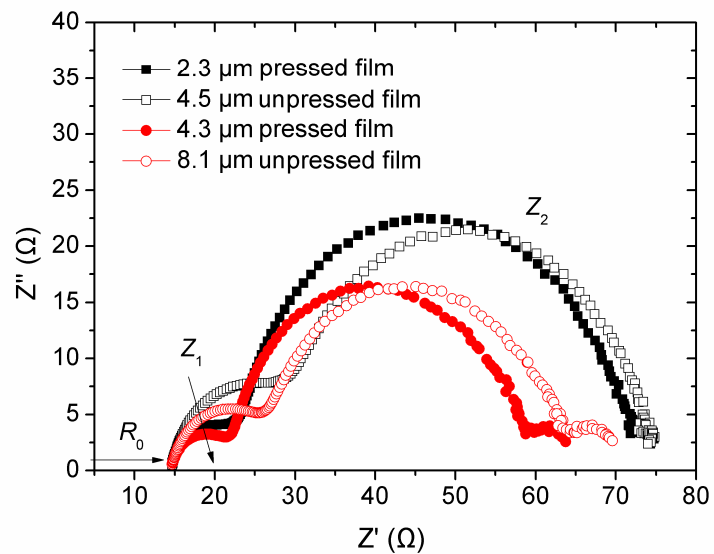

65

**Figure S5.** Impedance spectra of the composite films with different thickness.  $R_1$  drops off evidently due to mechanical press, implying a smaller electron transport resistance at the active film/FTO interface and/or the inter-nanostructure interface.

70

**Supplementary Material (ESI) for PCCP**  
**This journal is © the Owner Societies 2010**

75

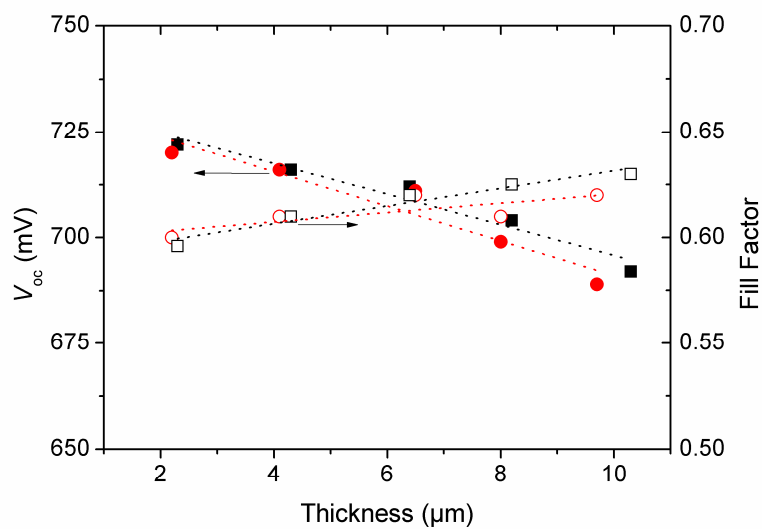

**Figure S6.** Dependences of  $V_{oc}$  (solid symbols) and fill factor (open symbols) on film thickness for composite films with ZnO nanotetrapods (black square symbols) and big particles (red circle symbols) as additives.

85

90

Supplementary Material (ESI) for PCCP  
This journal is © the Owner Societies 2010

95

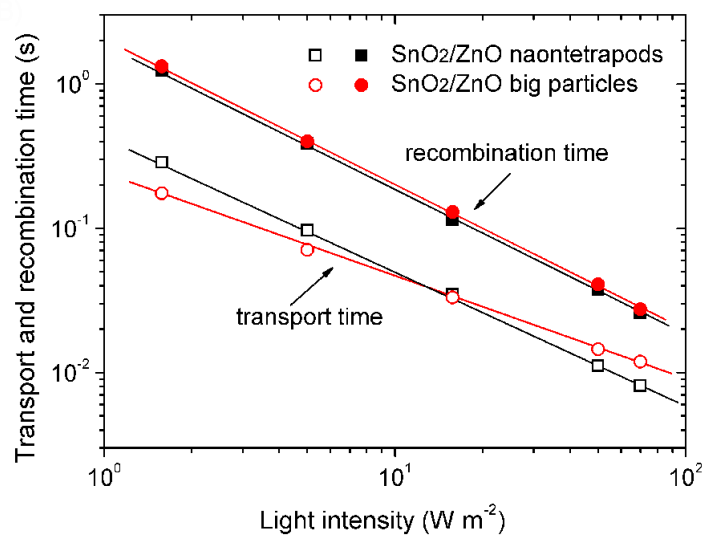

**Figure S7.** Dependences of electron transport time and recombination time on light intensity for composite films containing ZnO nanotetrapods (black square symbols) and big ZnO particles (red circle symbols) as additives. Similar observation were reported previously in high temperature calcined SnO<sub>2</sub>/ZnO nanocomposite films.

105

110



Supplementary Material (ESI) for PCCP  
This journal is © the Owner Societies 2010

115

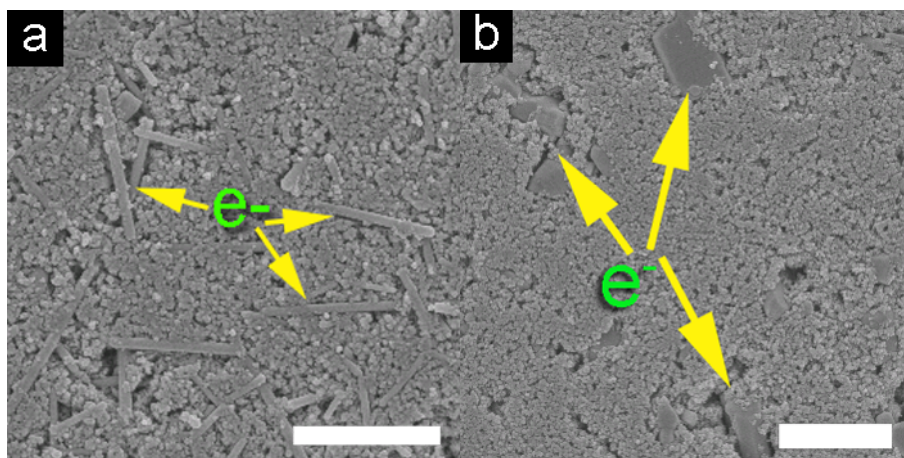

120 **Figure S8.** SEM images of composite films containing ZnO nanotetrapods (a) and ZnO big particles (b) as additives. Scale bar = 1  $\mu\text{m}$ . Yellow arrow-lines highlight different lengths the localized electrons have to migrate from  $\text{SnO}_2$  nanoparticles to the neighboring ZnO sites.
